# Supplementary material for: 0.005% Preservative-Free Latanoprost Triggers Meibomian Gland Dysfunction in Mice via Inflammation and Oxidative Stress Modulation
Source: Research Square preprint supplement (doi:10.21203/rs.3.rs-6897699/v1), 2025-11-13
Supplement: Supplementary file 1 [file 3d5da5267b86b71cddf099ae.docx]

***Supplementary material***

Anti-Prostaglandin F2 alpha Receptor/PTGFR antibody (FP, ab176493; Abcam), Anti-CD11b antibody (CD11b, ab1211; Abcam) lymphocyte antigen 6 complex locus G6D (Ly6G, ab238132; Abcam), Anti-Syndecan 3(3-NT, ab191308; Abcam), NADPH oxidase 4 (NOX4, ab112414; Abcam), Anti-4 Hydroxynonenal (4HNE, ab48506; Abcam), Kelch-like ECH-associated protein 1 (Keap1, 10503-2-AP; proteintech), nuclear factor (erythroid-derived 2)-like 2 (Nrf2, 61599; proteintech), heme oxygenase (HO-1, 10701-1-AP; proteintech), Anti-SOD2(SOD2; ab68155; Abcam) (p)-NFκB (1:1000; catalog no. 3033S; Cell Signaling Technology, MA, USA), NFκB (1:1000; catalog no. 8242S; Cell Signaling Technology), p-Erk (1:1000; catalog no.; Cell Signaling Technology), Erk (1:1000; catalog no.; Cell Signaling Technology), PI3K (1:1000; catalog no.; Cell Signaling Technology) and horseradish peroxidase (HRP)-conjugated anti-β-actin antibody (1:10,000; catalog no. a5316; Sigma-Aldrich Corp., St. Louis, MO, USA). HRP-conjugated goat anti-rabbit IgG (1:10,000; catalog no. a0545; Sigma-Aldrich Corp) or goat anti-mouse IgG (1:10,000; Sigma-Aldrich Corp). Alexa-Fluor 488-conjugated donkey anti-rat (1:300; catalog no.; Invitrogen, Eugene, OR, USA) or anti-rabbit IgG (1:300; Catalog no. A21206; Invitrogen). DAB Kit (ZLI9019; ZSGB-BIO)
